# Supplementary material for: Risk Factors in HIV-1 Positive Patients on the Intensive Care Unit: A Single Center Experience from a Tertiary Care Hospital
Source: MDPI journal article supplement (doi:10.3390/v15051164), 2023-05-13
Supplement: s1 [file s1]

## Supplemental Tables and Figures

**Figure S 1:** Kaplan-Meier curves of overall survival with (A) Hepatitis B and (B) Hepatitis C co-infection.

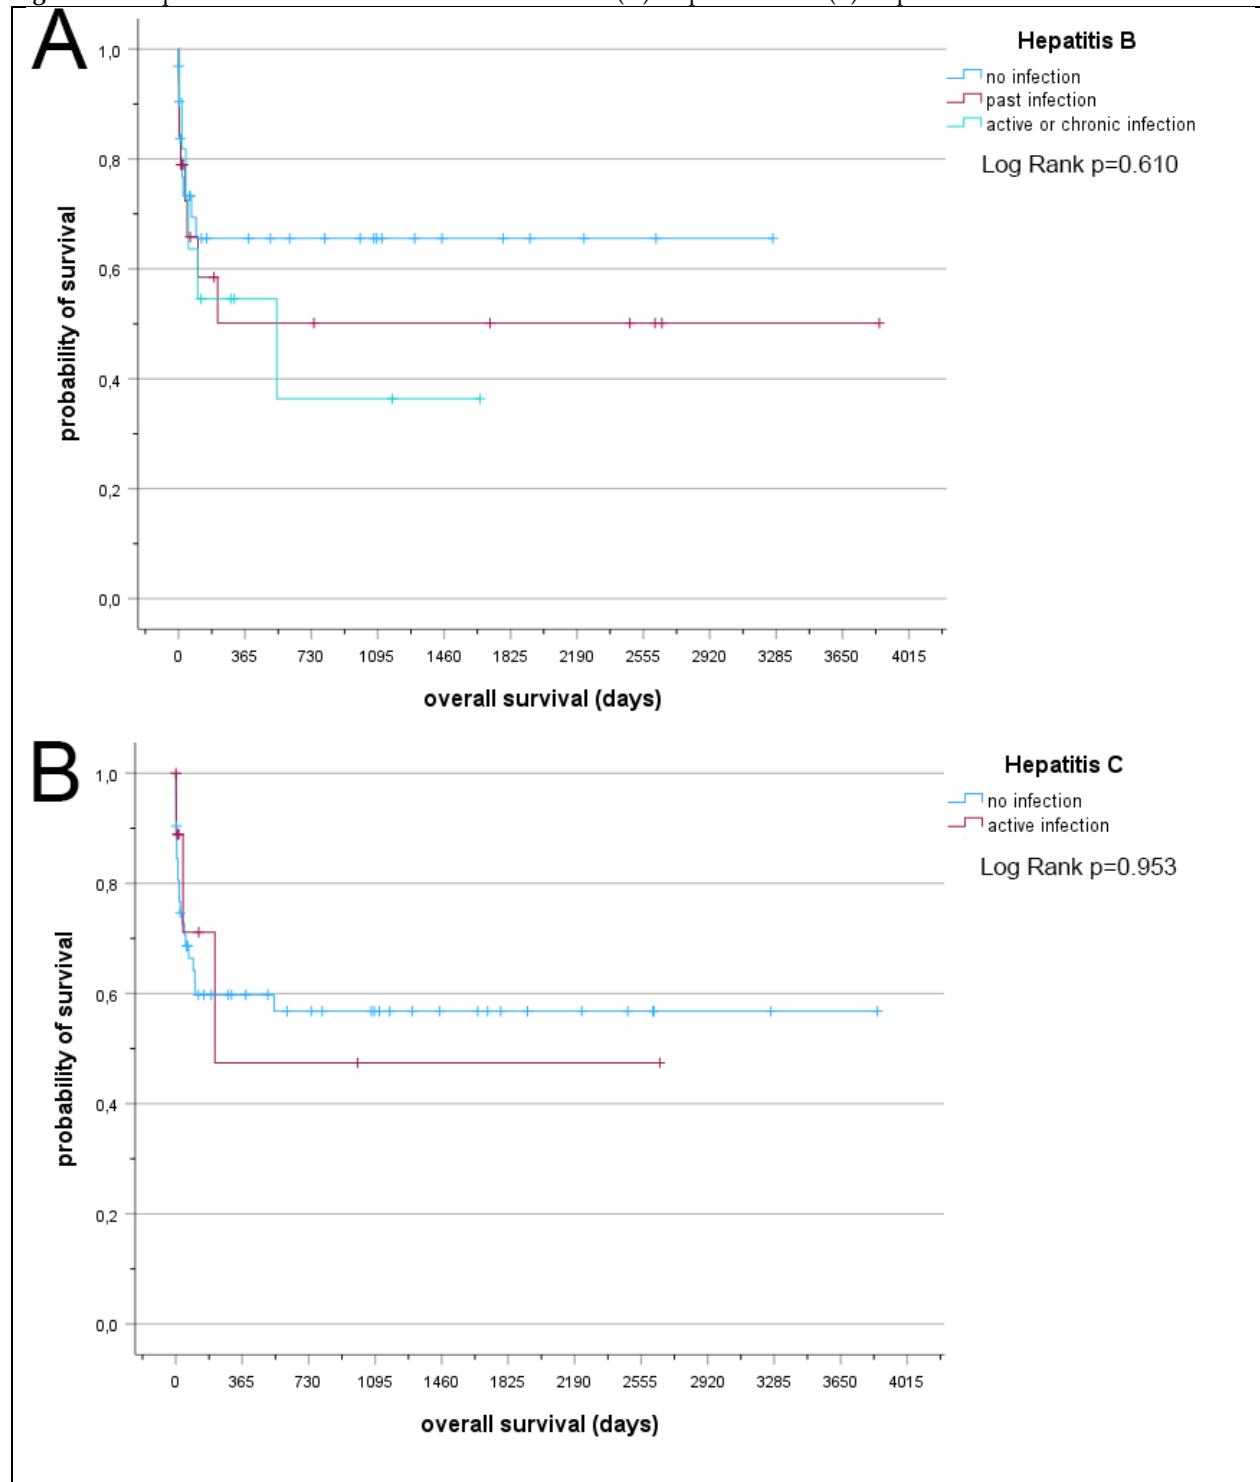

**Figure S 2:** Area under the curve Receiver operating characteristic analysis for (A) respiratory parameters, (B) laboratory values of blood gas analysis, (C) blood count values, (D) CD4-count, pH level and body mass index, (E) renal and hepatic parameters as well as (F) HIV copy load, co-infections and body temperature.

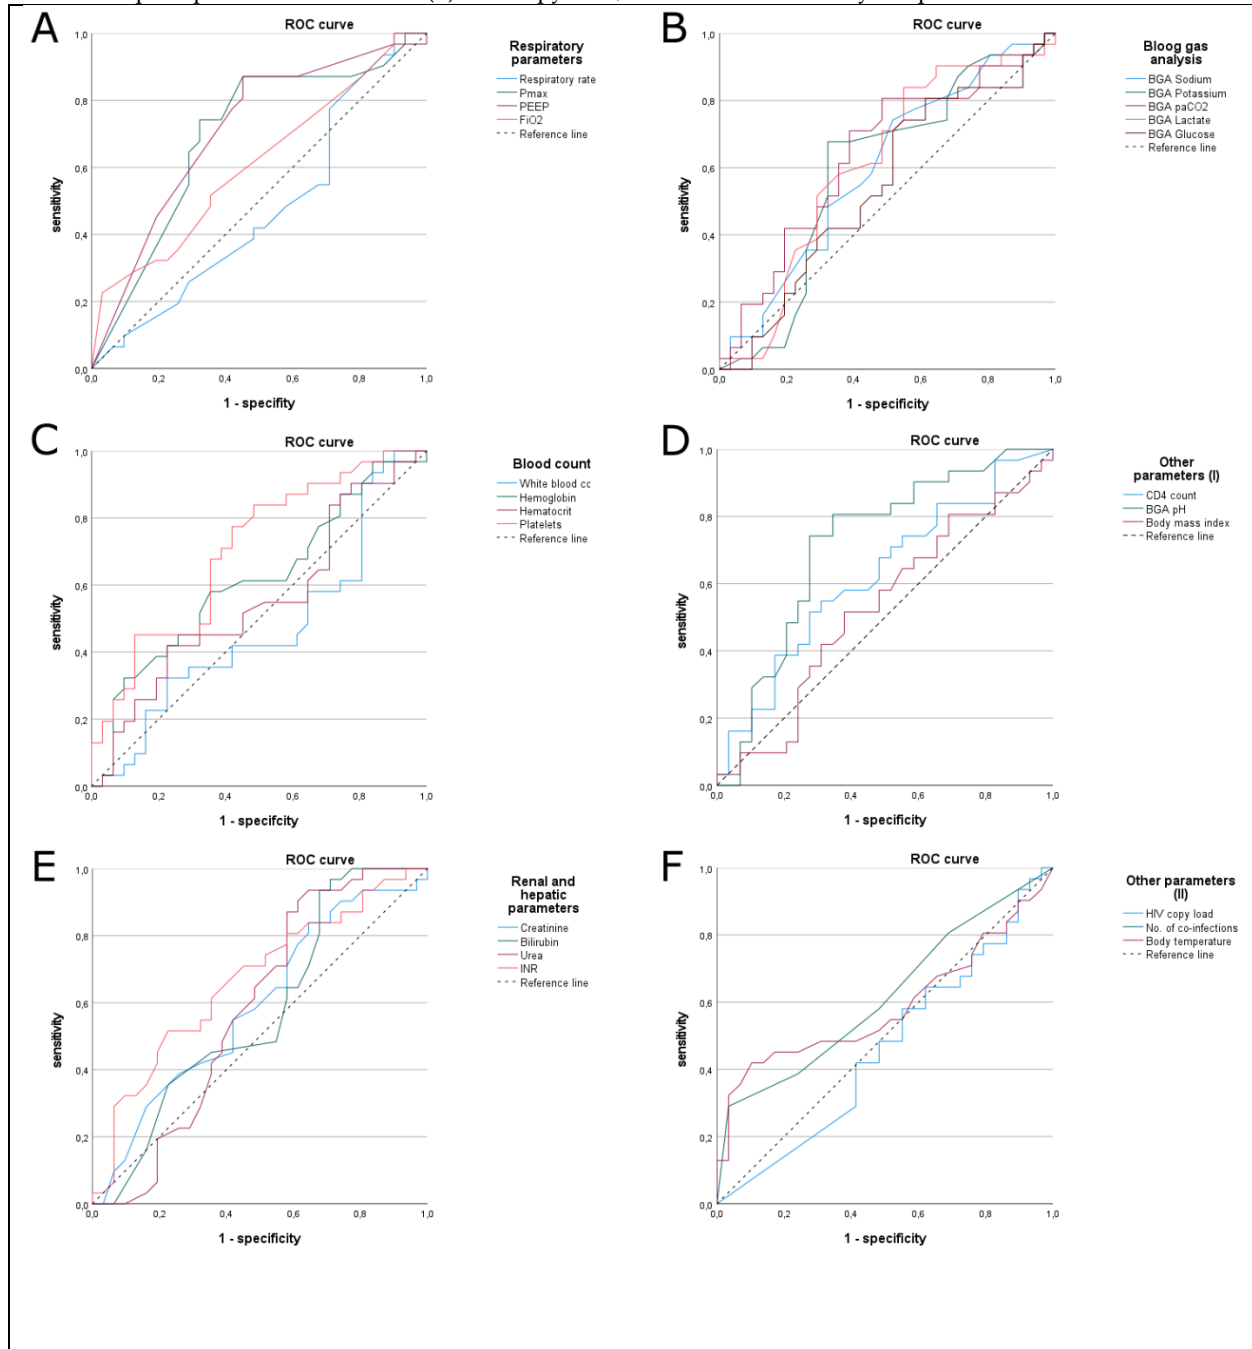

**Table S 1:** ART regimen in evaluated patients

| No | Use of ART                                                                                | INI                                                                                      | NRTI                                                                                                 | PI                                                                                                  | NNRTI                                                                                | EI                         | Additive                          |
|----|-------------------------------------------------------------------------------------------|------------------------------------------------------------------------------------------|------------------------------------------------------------------------------------------------------|-----------------------------------------------------------------------------------------------------|--------------------------------------------------------------------------------------|----------------------------|-----------------------------------|
|    | 0 = preexisting<br>1 = newly initiated<br>2 = incompliant use<br>3 = no therapy initiated | 0 = no INI<br>1 = raltegravir<br>2 = dolutegravir<br>3 = elvitegravir<br>4 = bictegravir | 0 = no NRTI<br>1 = lamivudine<br>2 = emtricitabine<br>3 = stavudine<br>4 = abacavir<br>5 = tenofovir | 0 = no PI<br>1 = ritonavir<br>2 = lopinavir<br>3 = darunavir<br>4 = atazanavir<br>5 = fosamprenavir | 0 = no NNRTI<br>1 = enfurvitide<br>2 = etravirine<br>3 = efavirenz<br>4 = nevirapine | 0 = no EI<br>1 = maraviroc | 0 = no additive<br>1 = cobicistat |
| 1  | 1                                                                                         | 1                                                                                        | 1                                                                                                    | 2                                                                                                   | 0                                                                                    | 0                          | 0                                 |
| 2  | 0                                                                                         | 1                                                                                        | 0                                                                                                    | 1,3                                                                                                 | 0                                                                                    | 0                          | 0                                 |
| 3  | 1                                                                                         | 0                                                                                        | 2,5                                                                                                  | 1,3                                                                                                 | 0                                                                                    | 0                          | 0                                 |
| 4  | 1                                                                                         | 0                                                                                        | 2,5                                                                                                  | 1,3                                                                                                 | 0                                                                                    | 0                          | 0                                 |
| 5  | 1                                                                                         | 1                                                                                        | 2,5                                                                                                  | 0                                                                                                   | 0                                                                                    | 0                          | 0                                 |
| 6  | 1                                                                                         | 1                                                                                        | 2,5                                                                                                  | 0                                                                                                   | 0                                                                                    | 0                          | 0                                 |
| 7  | 1                                                                                         | 1                                                                                        | 3                                                                                                    | 0                                                                                                   | 1                                                                                    | 0                          | 0                                 |
| 8  | 2                                                                                         | 0                                                                                        | 0                                                                                                    | 0                                                                                                   | 0                                                                                    | 0                          | 0                                 |
| 9  | 1                                                                                         | 1                                                                                        | 0                                                                                                    | 1,3                                                                                                 | 2                                                                                    | 0                          | 0                                 |
| 10 | 0                                                                                         | 2                                                                                        | 1,4                                                                                                  | 0                                                                                                   | 0                                                                                    | 0                          | 0                                 |
| 11 | 0                                                                                         | 3                                                                                        | 2,5                                                                                                  | 0                                                                                                   | 0                                                                                    | 0                          | 1                                 |
| 12 | 0                                                                                         | 3                                                                                        | 2,5                                                                                                  | 0                                                                                                   | 0                                                                                    | 0                          | 1                                 |
| 13 | 1                                                                                         | 2                                                                                        | 2,5                                                                                                  | 0                                                                                                   | 0                                                                                    | 0                          | 0                                 |
| 14 | 0                                                                                         | 0                                                                                        | 1,4                                                                                                  | 4                                                                                                   | 0                                                                                    | 0                          | 0                                 |
| 15 | 1                                                                                         | 0                                                                                        | 2,5                                                                                                  | 3                                                                                                   | 0                                                                                    | 0                          | 1                                 |
| 16 | 1                                                                                         | 1                                                                                        | 2,5                                                                                                  | 0                                                                                                   | 0                                                                                    | 0                          | 0                                 |
| 17 | 2                                                                                         | 0                                                                                        | 0                                                                                                    | 0                                                                                                   | 0                                                                                    | 0                          | 0                                 |
| 18 | 0                                                                                         | 0                                                                                        | 2,5                                                                                                  | 3                                                                                                   | 0                                                                                    | 0                          | 1                                 |
| 19 | 0                                                                                         | 3                                                                                        | 2,5                                                                                                  | 0                                                                                                   | 0                                                                                    | 0                          | 0                                 |
| 20 | 0                                                                                         | 4                                                                                        | 2,5                                                                                                  | 0                                                                                                   | 0                                                                                    | 0                          | 0                                 |
| 21 | 2                                                                                         | 2                                                                                        | 2,5                                                                                                  | 0                                                                                                   | 0                                                                                    | 0                          | 0                                 |
| 22 | 1                                                                                         | 1                                                                                        | 2,5                                                                                                  | 0                                                                                                   | 0                                                                                    | 0                          | 0                                 |
| 23 | 0                                                                                         | 4                                                                                        | 2,5                                                                                                  | 0                                                                                                   | 0                                                                                    | 0                          | 0                                 |
| 24 | 1                                                                                         | 0                                                                                        | 2,5                                                                                                  | 1,5                                                                                                 | 0                                                                                    | 0                          | 0                                 |
| 25 | 1                                                                                         | 0                                                                                        | 2,5                                                                                                  | 1,2                                                                                                 | 0                                                                                    | 0                          | 0                                 |
| 26 | 2                                                                                         | 0                                                                                        | 1,4                                                                                                  | 4                                                                                                   | 0                                                                                    | 0                          | 0                                 |
| 27 | 1                                                                                         | 0                                                                                        | 1,3                                                                                                  | 2                                                                                                   | 0                                                                                    | 0                          | 0                                 |
| 28 | 3                                                                                         | 0                                                                                        | 0                                                                                                    | 0                                                                                                   | 0                                                                                    | 0                          | 0                                 |
| 29 | 0                                                                                         | 0                                                                                        | 1,4                                                                                                  | 0                                                                                                   | 3                                                                                    | 0                          | 0                                 |
| 30 | 0                                                                                         | 0                                                                                        | 1,4                                                                                                  | 1,4                                                                                                 | 0                                                                                    | 0                          | 0                                 |
| 31 | 0                                                                                         | 1                                                                                        | 1                                                                                                    | 0                                                                                                   | 3                                                                                    | 0                          | 0                                 |
| 32 | 1                                                                                         | 0                                                                                        | 1,4                                                                                                  | 1,3                                                                                                 | 0                                                                                    | 0                          | 0                                 |
| 33 | 1                                                                                         | 0                                                                                        | 1,4                                                                                                  | 1,3                                                                                                 | 0                                                                                    | 0                          | 0                                 |
| 34 | 2                                                                                         | 1                                                                                        | 0                                                                                                    | 1,3                                                                                                 | 2                                                                                    | 0                          | 0                                 |
| 35 | 3                                                                                         | 0                                                                                        | 0                                                                                                    | 0                                                                                                   | 0                                                                                    | 0                          | 0                                 |
| 36 | 0                                                                                         | 1                                                                                        | 0                                                                                                    | 1,2                                                                                                 | 3                                                                                    | 0                          | 0                                 |

**Table S 1 (cont.):** ART regimen in evaluated patients

| No | Use of ART                                                                                 | INI                                                                                      | NRTI                                                                                                 | PI                                                                                                  | NNRTI                                                                                | EI                         | Addi-<br>tive                     |
|----|--------------------------------------------------------------------------------------------|------------------------------------------------------------------------------------------|------------------------------------------------------------------------------------------------------|-----------------------------------------------------------------------------------------------------|--------------------------------------------------------------------------------------|----------------------------|-----------------------------------|
|    | 0 = preexisting<br>1 = newly initiated<br>2 = in compliant use<br>3 = no therapy initiated | 0 = no INI<br>1 = raltegravir<br>2 = dolutegravir<br>3 = elvitegravir<br>4 = bictegravir | 0 = no NRTI<br>1 = lamivudine<br>2 = emtricitabine<br>3 = stavudine<br>4 = abacavir<br>5 = tenofovir | 0 = no PI<br>1 = ritonavir<br>2 = lopinavir<br>3 = darunavir<br>4 = atazanavir<br>5 = fosamprenavir | 0 = no NNRTI<br>1 = enfurvitide<br>2 = etravirine<br>3 = efavirenz<br>4 = nevirapine | 0 = no EI<br>1 = maraviroc | 0 = no additive<br>1 = cobicistat |
| 37 | 0                                                                                          | 1                                                                                        | 1                                                                                                    | 0                                                                                                   | 3                                                                                    | 0                          | 0                                 |
| 38 | 0                                                                                          | 0                                                                                        | 2,5                                                                                                  | 0                                                                                                   | 4                                                                                    | 0                          | 0                                 |
| 39 | 1                                                                                          | 1                                                                                        | 0                                                                                                    | 1,3                                                                                                 | 0                                                                                    | 0                          | 0                                 |
| 40 | 0                                                                                          | 0                                                                                        | 2,5                                                                                                  | 1,3                                                                                                 | 0                                                                                    | 0                          | 0                                 |
| 41 | 1                                                                                          | 0                                                                                        | 2,5                                                                                                  | 1,3                                                                                                 | 0                                                                                    | 0                          | 0                                 |
| 42 | 0                                                                                          | 1                                                                                        | 2,5                                                                                                  | 0                                                                                                   | 0                                                                                    | 0                          | 0                                 |
| 43 | 0                                                                                          | 1                                                                                        | 2,5                                                                                                  | 0                                                                                                   | 0                                                                                    | 0                          | 0                                 |
| 44 | 1                                                                                          | 0                                                                                        | 2,5                                                                                                  | 1,3                                                                                                 | 2                                                                                    | 0                          | 0                                 |
| 45 | 3                                                                                          | 1                                                                                        | 2,5                                                                                                  | 0                                                                                                   | 0                                                                                    | 0                          | 0                                 |
| 46 | 3                                                                                          | 3                                                                                        | 2,5                                                                                                  | 0                                                                                                   | 0                                                                                    | 0                          | 1                                 |
| 47 | 1                                                                                          | 0                                                                                        | 2,5                                                                                                  | 1,3                                                                                                 | 0                                                                                    | 0                          | 0                                 |
| 48 | 1                                                                                          | 0                                                                                        | 2,5                                                                                                  | 1,3                                                                                                 | 0                                                                                    | 0                          | 0                                 |
| 49 | 0                                                                                          | 1                                                                                        | 2,5                                                                                                  | 0                                                                                                   | 0                                                                                    | 0                          | 0                                 |
| 50 | 1                                                                                          | 1                                                                                        | 2,5                                                                                                  | 0                                                                                                   | 0                                                                                    | 0                          | 0                                 |
| 51 | 1                                                                                          | 1                                                                                        | 0                                                                                                    | 1                                                                                                   | 2                                                                                    | 0                          | 0                                 |
| 52 | 0                                                                                          | 0                                                                                        | 1,4                                                                                                  | 0                                                                                                   | 0                                                                                    | 1                          | 0                                 |
| 53 | 1                                                                                          | 0                                                                                        | 2,5                                                                                                  | 1,3                                                                                                 | 0                                                                                    | 0                          | 0                                 |
| 54 | 0                                                                                          | 1                                                                                        | 0                                                                                                    | 0                                                                                                   | 0                                                                                    | 1                          | 0                                 |
| 55 | 0                                                                                          | 1                                                                                        | 3                                                                                                    | 1,2                                                                                                 | 0                                                                                    | 0                          | 0                                 |
| 56 | 0                                                                                          | 1                                                                                        | 0                                                                                                    | 1,3                                                                                                 | 2                                                                                    | 0                          | 0                                 |
| 57 | 0                                                                                          | 1                                                                                        | 2,5                                                                                                  | 0                                                                                                   | 0                                                                                    | 0                          | 0                                 |
| 58 | 0                                                                                          | 0                                                                                        | 2,5                                                                                                  | 3                                                                                                   | 0                                                                                    | 0                          | 0                                 |
| 59 | 0                                                                                          | 1                                                                                        | 0                                                                                                    | 1,3                                                                                                 | 2                                                                                    | 0                          | 0                                 |
| 60 | 2                                                                                          | 0                                                                                        | 2,5                                                                                                  | 0                                                                                                   | 3                                                                                    | 0                          | 0                                 |
| 61 | 2                                                                                          | 3                                                                                        | 2,5                                                                                                  | 0                                                                                                   | 0                                                                                    | 0                          | 1                                 |
| 62 | 0                                                                                          | 4                                                                                        | 2,5                                                                                                  | 0                                                                                                   | 0                                                                                    | 0                          | 0                                 |

ART: antiretroviral treatment; INI: integrase inhibitor; NRTI: nucleoside reverse transcriptase inhibitor; PI: protease inhibitor; NNRTI: non-nucleoside reverse transcriptase inhibitor; EI: entry inhibitor; if the in compliant use of a preexisting ART was not sufficiently reproducible, all terms were documented as '0'.

**Table S 2:** Comparison of gender differences and comorbidities and disabilities at ICU-admission

| Gender                     |                   | Female<br>n=14  |      | Male<br>n=48    |      |         |
|----------------------------|-------------------|-----------------|------|-----------------|------|---------|
|                            |                   | n               | in % | n               | in % | p       |
| Age (years)                | [mean ± SD]       | 43.7 (± 12.9)   |      | 47.1 (± 11.3)   |      | *0.392  |
| BMI (kg/m²)                | [mean ± SD]       | 22.1 (± 7.0)    |      | 22.3 (± 4.8)    |      | *0.897  |
| CD4-count (cells/ µl)      | [mean ± SD]       | 125.1 (± 125.7) |      | 176.1 (± 278.6) |      | *0.342  |
| HIV-copies (mio./ µl)      | [mean ± SD]       | 0.823 (± 1.554) |      | 0.479 (± 1.145) |      | *0.453  |
| Comorbidities              |                   |                 |      |                 |      |         |
| Co-infections              |                   |                 |      |                 |      | #1.000  |
| -                          | Yes               | 11              | 78.6 | 39              | 81.3 |         |
| -                          | No                | 3               | 21.4 | 9               | 18.8 |         |
| Hepatitis B                |                   |                 |      |                 |      | \$0.688 |
| -                          | Active or chronic | 3               | 21.4 | 8               | 16.7 |         |
| -                          | Past infection    | 3               | 21.4 | 16              | 33.3 |         |
| -                          | No infection      | 8               | 57.1 | 24              | 50.0 |         |
| Hepatitis C                |                   |                 |      |                 |      | #0.431  |
| -                          | Active infection  | 1               | 7.1  | 9               | 18.8 |         |
| -                          | No infection      | 13              | 92.9 | 39              | 81.3 |         |
| Hematological neoplasia    |                   |                 |      |                 |      | #1.000  |
| -                          | Yes               | 3               | 21.4 | 11              | 22.9 |         |
| -                          | No                | 11              | 78.6 | 37              | 77.1 |         |
| Solid neoplasia            |                   |                 |      |                 |      | \$0.706 |
| -                          | Yes, metastasized | 1               | 7.1  | 2               | 4.2  |         |
| -                          | Yes, localized    | 2               | 14.3 | 4               | 8.3  |         |
| -                          | No                | 11              | 78.6 | 42              | 87.5 |         |
| Myocardial comorbidity     |                   |                 |      |                 |      | #0.743  |
| -                          | Yes               | 4               | 28.6 | 12              | 25.0 |         |
| -                          | No                | 10              | 71.4 | 36              | 75.0 |         |
| Rhythmological comorbidity |                   |                 |      |                 |      | #0.296  |
| -                          | Yes               | 5               | 35.7 | 10              | 20.8 |         |
| -                          | No                | 9               | 64.3 | 38              | 79.2 |         |
| Pulmonary comorbidity      |                   |                 |      |                 |      | #0.739  |
| -                          | Yes               | 3               | 21.4 | 15              | 31.3 |         |
| -                          | No                | 11              | 78.6 | 33              | 68.8 |         |
| Vascular comorbidity       |                   |                 |      |                 |      | #0.475  |
| -                          | Yes               | 3               | 21.4 | 8               | 16.7 |         |
| -                          | No                | 11              | 78.6 | 40              | 83.3 |         |
| Arterial hypertension      |                   |                 |      |                 |      | #0.028  |
| -                          | Yes               | 7               | 50.0 | 8               | 16.7 |         |
| -                          | No                | 7               | 50.0 | 40              | 83.3 |         |
| Renal comorbidity          |                   |                 |      |                 |      | #1.000  |
| -                          | Yes               | 6               | 42.9 | 19              | 39.6 |         |
| -                          | No                | 8               | 57.1 | 29              | 60.4 |         |
| Hepatic comorbidity        |                   |                 |      |                 |      | #0.348  |
| -                          | Yes               | 7               | 50.0 | 16              | 33.3 |         |
| -                          | No                | 7               | 50.0 | 32              | 66.7 |         |
| Neurological comorbidity   |                   |                 |      |                 |      | #1.000  |
| -                          | Yes               | 8               | 57.1 | 26              | 54.2 |         |
| -                          | No                | 6               | 42.9 | 22              | 45.8 |         |

p-values estimated by \* two-tailed student's t-test, #Fisher's exact test, \$  $\chi^2$  test

**Table S 3:** Student's t-tests between subcohorts with and without malignant diseases.

|            |                 | No malignancy<br>n=39 | Malignancy<br>n=23 |       |
|------------|-----------------|-----------------------|--------------------|-------|
|            |                 | Mean ( $\pm$ SD)      | Mean ( $\pm$ SD)   | p     |
| Age        | (years)         | 43.4 ( $\pm$ 10.0)    | 51.2 ( $\pm$ 13.1) | 0.018 |
| CD4 count  | ( $\mu$ l)      | 219.5 ( $\pm$ 298.5)  | 68.7 ( $\pm$ 73.4) | 0.005 |
| HIV copies | (mio / $\mu$ l) | 0.48 ( $\pm$ 1.01)    | 0.70 ( $\pm$ 1.59) | 0.568 |
| SAPS 2     | (pts)           | 62.4 ( $\pm$ 20.3)    | 65.5 ( $\pm$ 16.7) | 0.523 |
| APACHE II  | (pts)           | 23.3 ( $\pm$ 9.0)     | 25.0 ( $\pm$ 6.7)  | 0.373 |
| SOFA       | (pts)           | 8.1 ( $\pm$ 5.0)      | 9.9 ( $\pm$ 5.3)   | 0.189 |

**Table S 4:** Multivariate Cox regression survival analysis (n=60) including HIV viral load and CD4+ cell count.

| Variables                        | 30-day survival |          | p     | 60-day survival |          | p     | Median overall survival |          | p     |
|----------------------------------|-----------------|----------|-------|-----------------|----------|-------|-------------------------|----------|-------|
|                                  | HR              | 95% CI   |       | HR              | 95% CI   |       | HR                      | 95% CI   |       |
| specifications                   |                 |          |       |                 |          |       |                         |          |       |
| pH                               |                 |          | 0.012 |                 |          | 0.018 |                         |          |       |
| < 7.31                           | 5.5             | 1.5-20.6 |       | 3.5             | 1.2-9.7  |       |                         |          |       |
| $\geq 7.31$ (index)              |                 |          |       |                 |          |       |                         |          |       |
| Platelet count                   |                 |          | 0.019 |                 |          | 0.012 |                         |          | 0.012 |
| < 164,000 / $\mu$ l              | 6.7             | 1.4-32.7 |       | 5.5             | 1.5-20.9 |       | 3.8                     | 1.3-10.7 |       |
| $\geq 164,000$ / $\mu$ l (index) |                 |          |       |                 |          |       |                         |          |       |
| Solid Neoplasm                   |                 |          | 0.022 |                 |          | 0.003 |                         |          | 0.036 |
| No solid Npl. (index)            |                 |          |       |                 |          |       |                         |          |       |
| Localized Npl.                   | 8.6             | 1.3-55.7 | 0.024 | 8.8             | 1.8-42.1 | 0.011 | 4.2                     | 1.2-15.4 | 0.028 |
| Metastasized Npl.                | 4.8             | 0.9-25.0 | 0.064 | 5.9             | 1.5-23.6 | 0.012 | 2.7                     | 0.7-10.2 | 0.139 |
| APACHE II                        |                 |          |       |                 |          |       |                         |          | 0.004 |
| < 25 pts. (index)                |                 |          |       |                 |          |       |                         |          |       |
| $\geq 25$ pts.                   |                 |          |       |                 |          |       | 4.7                     | 1.7-13.5 |       |

p-values calculated via forward likelihoodratio test, inclusion criteria 0.05, exclusion criteria 0.10; HR: hazard ratio; 95% CI: 95 % confidence interval. Factors evaluated: CD4+ cell count (1) (< 50/ $\mu$ l vs.  $\geq$  50 / $\mu$ l), CD4+ cell count (2) (< 200/ $\mu$ l vs.  $\geq$  200/ $\mu$ l), HIV viral load (< 200 copies/ $\mu$ l vs.  $\geq$  200 copies/  $\mu$ l), pH (< 7.31 vs.  $\geq$  7.31); platelets (< 164,000 / $\mu$ l vs.  $\geq$  164,000 / $\mu$ l); vasopressor use at first 24 hours after ICU admission (yes vs. no); worst ventilation setting at first 24 hours after ICU admission (invasive ventilation vs. non-invasive ventilation plus spontaneous breathing); Pmax (< 16.5 cmH<sub>2</sub>O vs.  $\geq$  16.5 cmH<sub>2</sub>O); PEEP (< 7.5 cmH<sub>2</sub>O vs.  $\geq$  7.5 cmH<sub>2</sub>O); Solid Neoplasm (No neoplasm vs. localized neoplasm vs. metastasized neoplasm); SOFA (< 7 pts. vs.  $\geq$  7 pts.); SAPS 2 (< 59 pts. vs.  $\geq$  59 pts.); APACHE II (< 25 pts. vs.  $\geq$  25 pts.). Index parameters are marked via (index).
